1 A delayed modulation of solar ultraviolet radiation on  
2 the COVID-19 transmission reflects an incubation  
3 period

Maosheng He <sup>1†</sup>, Keyan Fang <sup>2,3\*†</sup>, Feifei Zhou<sup>2</sup>, Tinghai Ou<sup>3</sup>,  
Deliang Chen <sup>3</sup>

<sup>1</sup>Private

<sup>2</sup>Key Laboratory of Humid Subtropical Eco-geographical Process (Ministry of Education),  
Fujian Normal University, Fuzhou 350007, China

<sup>3</sup>Regional Climate Group, Department of Earth Sciences, University of Gothenburg,  
Gothenburg 460, Sweden

\*To whom correspondence should be addressed; E-mail: [keyan.fang@gu.se](mailto:keyan.fang@gu.se).

† These authors contributed equally to this work

Running title: COVID-19 incubation period reflected by delayed solar UV modulation

4 One-sentence summary: A delayed modulation of ultraviolet radiation on the COVID-19  
5 transmission provides independent evidence for a 7-day incubation period and implies a strong  
6 seasonality

7        **Laboratory experiments have revealed the meteorological sensitivity of the**  
8        **coronavirus disease 2019 (COVID-19) virus. However, no consensus has been**  
9        **reached about how outdoor meteorological conditions modulate the virus trans-**  
10       **mission as it is also constrained by non-meteorological conditions. Here, we**  
11       **find that statistically, non-meteorological factors constrain the growth rate of**  
12       **cumulative confirmed cases least when the cases in a country arrive around**  
13       **1300–3200. The least-constrained growth rate correlates with the ultraviolet**  
14       **flux and temperature significantly (correlation coefficients  $r=-0.55\pm0.09$  and**  
15        **$-0.40\pm0.10$  at  $p < 0.01$ , respectively), but not with precipitation, humidity, and**  
16       **wind. The ultraviolet correlation exhibits a delay of about seven days, pro-**  
17       **viding a meteorological measure of the incubation period. Our work reveals a**  
18       **seasonality of COVID-19 and a high risk of a pandemic resurgence in winter,**  
19       **implying a need for seasonal adaption in public policies.**

## 1 Introduction

A way to predict the COVID-19 transmissions in winter is to quantify the responses of the virus survival and transmission to the winter weather conditions. Laboratory experiments revealed that the ultraviolet (UV) radiation and air temperature modulate the airborne survival of the virus strongly[1, 2, 3]. Meanwhile, several studies have attempted to extract relevant epidemiological evidence, e.g., [4, 5, 6, 7], through studying the correlations between the count of confirmed cases or mortality and meteorological conditions using data from priorly selected cities. Their conclusions, however, are often contradictory. Some attempts did not find the correlation, e.g., [4, 3], whereas the others reported weak or moderate correlations, e.g., [5, 6, 7]. The results are not conclusive, mainly because the transmission is constrained by non-meteorological factors which can hardly be considered in an appropriate way.

At the early stage of an uncontrolled outbreak, the infection cases grow exponentially, whereas its growth rate is relatively stable, e.g., [8]. Accordingly, here we chose the growth rate as an index of the COVID-19 transmission, which is expected to be more susceptible to meteorological conditions than the infection cases. We estimate the growth rate through a sliding window regression using the daily count of the accumulative confirmed cases from each county. Constrained by insufficient test capability at the early stage, the confirmed cases' growth might not accurately reflect the infection growth. To deal with this problem, we calculate the correlation between the regressed growth rate and meteorological conditions across all countries as a function of the confirmed case count. The range of the accumulative confirmed cases, in which the correlation maximizes, is identified as the least-constrained stage. The growth rate at this stage is defined as the least-constrained growth rate, and its response to meteorological conditions is investigated statistically. As illustrated below, the least-constrained growth rate minimizes the contamination from non-meteorological factors, e.g., test capability and artificial

44 controls, and allows revealing meteorological modulations in detail.

## 45 **2 Data analyses and results**

46 This study uses daily cumulative confirmed COVID-19 cases at a country level and daily mete-  
47 orological variables until 1 September of 2020. The confirmed cases are from COVID-19 Data  
48 Repository by the Center for Systems Science and Engineering (CSSE) at Johns Hopkins Uni-  
49 versity, whereas the meteorological variables are extracted from the ERA5 reanalysis dataset  
50 from the European Centre for Medium-Range Weather Forecasts (ECMWF) (C3S, 2017). The  
51 meteorological variables analyzed herein include the air temperature at the height of 2 m above  
52 the surface (land, sea or inland waters), precipitation, relative humidity, wind speed at the height  
53 of 10 m, downward UV radiation flux at the surface (UV, in the range 250-440 nm), and diur-  
54 nal temperature range. The daily mean meteorological data were averaged for each country to  
55 compare with the country-level COVID-19 data. Below, we compare the growth of confirmed  
56 cases with its theoretical expectation, in an example country in Section 2.1 and statistically  
57 in Section 2.2, determine the statistical stage modulated most sensitively by weather in Section  
58 2.3, investigate the geographic distribution of the confirmed case growth and its correlation with  
59 meteorological factors in Sections 2.4 and 2.5, and diagnose the incubation period in Section  
60 2.6

### 61 **2.1 Evolution of the outbreak in an example county: stages of the con-** 62 **firmed case growth**

63 Fig. 1a displays the cumulative confirmed case number  $y$  as a function of time  $t$  in for Bulgaria  
64 as an example. Through a least-square regression, we fit  $y$  to an exponential model  $y = ae^{b(t-\tau)}$   
65 in a 28-day-wide sliding window. Here,  $\tau = 86, 88, \dots, 232$  day denotes the center of the sliding  
66 window,  $a$  measures the confirmed cases at  $\tau$ , and the exponent factor  $b$  measures the growth

## COVID-19 incubation period reflected by delayed solar UV modulation

---

67 rate. The regressed growth rate  $b$  is shown in Fig. 1b as a function of time  $\tau$ . (Besides  $b$ , the  
68 regression yields also  $a$  and  $r^2$ , a measure of the regression goodness equaling to the square  
69 of the correlation coefficient between  $y(t)$  and its regression values as used in the following  
70 sections. ) The regressed growth rate  $b$  can be divided into three stages, labeled as I, II, and  
71 III and indicated by the blue arrows in Fig. 1. Stages I and III are characterized by decreasing  
72 growth rates, whereas Stage II is associated with a relatively stable growth rate.

73 Theoretically, outbreaks of infectious diseases, e.g., [8, 9, 10], are characterized by two  
74 phases: the uncontrolled first phase showing stable exponential growth followed by a second  
75 phase with a decreasing growth rate usually after effective artificial controllers [11, 12]. The  
76 two-phase theoretical growth is sketched as the green dashed line in Fig. 1b, which are largely  
77 parallel to the growth of the confirmed case (black line) in Stages II and III, and can explain  
78 largely these stages. Stage II reflects the uncontrolled transmission of COVID-19, whereas  
79 Stage III reflects the decline phase where the decreasing growth rate could be explained as  
80 responses to artificial interventions or controllers, e.g., travel restrictions and changes in human  
81 behaviors, e.g., [13, 14]. However, in Stage I in Fig. 1b, the black line is not parallel to  
82 the green. In the beginning of the outbreak, infections cannot be confirmed timely and can  
83 accumulate until sufficient tests. The decreasing growth rate of the confirmed case, biased from  
84 the theoretical growth, might reflect more the delayed sufficient test capability than the infection  
85 growth.

86 Compared with Stages I and III, Stage II is characterized by a relatively stable growth rate  
87 reflecting uncontrolled transmissions confirmed timely and sufficiently. Therefore, we assume  
88 that in Stage II the growth is modulated most sensitively by the weather and will use Stage II  
89 for exploring the impacts of weather. In practice, instead of delimiting Stage II for each country  
90 individually, we explore Stage II statistically for all countries in the following subsection.

## 91 **2.2 Statistical evolution of the outbreak**

92 The previous section defined a daily growth rate of the cumulative confirmed COVID-19 cases  
93 in an example country through regression and used the growth rate to describe the evolution of  
94 the outbreak. We further implement the regression for every country, yielding  $a$ ,  $b$ , and  $r^2$  as  
95 functions of  $\tau$ . Fig. 2a and 2b display  $b$  against  $a$  and  $r^2$  from the 50% most developed countries,  
96 respectively. These countries are characterized by the gross domestic product per capita 2019  
97 above the median of all countries, 6200 United States dollars, and therefore are presumably least  
98 subject more to the socioeconomic factors [15, 16] as discussed further in Section 2.6. Here,  
99 we use  $a$  rather than the date  $t$  to coordinate the growth rate since the outbreaks do not occur  
100 at the same date in different countries. In Fig. 2b,  $b$  exhibits a dependence on  $r^2$  at  $r^2 < 0.9$ .  
101 Accordingly, we exclude  $b$  values associated with  $r^2 < 0.9$  from the following analyses.

102 In Fig. 2a, the growth curve  $b(a)$  does not clearly exhibit the three-stage shape of  $b(\tau)$   
103 in Fig. 1b but looks more complicated. The curve minimizes at  $a=10^2$ ,  $10^3-2\times 10^3$ ,  $10^4$  and  
104  $10^5$ . These minima might be signatures of data manipulation, e.g., [17], that some governments  
105 might try to "control" the infection cases to cross the orders of magnitude by manipulating the  
106 data. Neglecting these minima, we divide largely the growth curve  $b(a)$  into four stages. The  
107 final stage is characterized by a decreasing rate  $b(a)$ , corresponding to Stage III of the  $b(\tau)$   
108 growth in Fig. 1b, and is labeled here also as Stage III. The other stages of  $b(a)$  are labeled  
109 as I-, I, and II, respectively. Stage I- is associated with the small number of infection at an the  
110 very beginning, and the growth might be susceptible to uncertainties and therefore is excluded  
111 from the following analyses. Stage I is characterized largely by a decreasing growth rate  $b(a)$ ,  
112 corresponding to Stage I of  $b(\tau)$  in Fig. 1b. We assume that the  $b(a)$  in-between Stages I and  
113 III correspond to Stage II in Fig. 1b where the growth is relatively stable and reflects timely  
114 and sufficiently confirmed uncontrolled transmissions. Assuming that in Stage II the growth  
115 is modulated most sensitively by weather, we determine the statistical range of Stage II in the

116 following subsection.

### 117 **2.3 The statistical stage modulated most sensitively by weather**

118 The statistical Stage II can be denoted as  $a_c \cdot S^{-1} < a < a_c \cdot S$  where  $S$  represents the half-  
119 width of the stage and  $a_c$  represents the stage center. We temporally assign  $S=10^{0.2}$  and  $a_c=10^2$ ,  
120 search the maximum  $b(a)$  in the range  $a_c \cdot S^{-1} < a < a_c \cdot S$  for each country, and calculate its  
121 correlation coefficient  $r_{UV}$  with the UV flux (as detailed in the following subsections) across all  
122 countries. Similarly, we search the maximum correlation coefficient  $r_{UV}$  in  $a_c \cdot S^{-1} < a < a_c \cdot S$   
123 for  $a_c=10^{2.1}, 10^{2.2}, \dots$ , and  $10^{4.0}$ , at  $S=10^{0.2}$ . The absolute value  $|r_{UV}|$  as a function of  $a_c$  is  
124 displayed as the solid blue line in Fig. 3, which maximizes between  $a_c=2000-4000$ . The  
125 maximum implies that at this stage of  $a$  the growth is modulated statistically strongest by the  
126 meteorological conditions.

127 Therefore, we take  $2000 \times 10^{-0.2} < a < 2000 \times 10^{0.2}$  (approximately  $1300 < a < 3200$ )  
128 as the statistical Stage II. In this  $a$  range, the maximum growth rate  $b(a)$  in each country is  
129 identified, referred to as the least-constrained growth rate  $b_m$ . The red crosses in Fig. 2a display  
130 the  $b_m$  of all countries, associated with a median  $a=1424$ .

131 Note that the conclusions of the current work are not subject to our chooses  $S=10^{0.2}$  and  
132  $a_c = 2000$ , learn from the same Figures as presented in the current work but for  $S=10^{0.1}$  and  
133  $10^{0.3}$ , and for  $a_c=1500$  and  $2500$  (not shown).

### 134 **2.4 Geographical distribution of the daily growth rate in percentage**

135 According to our regression model, the least-constrained growth rate  $b_m$  is an exponent and  
136  $e^{b_m}$  measures the ratio of the regressed number of confirmed cases of one day over that of the  
137 previous day. Therefore,  $g := (e^{b_m} - 1) * 100\%$  is the daily growth rate by percentage. When  
138  $b_m \approx 0$ ,  $b_m$  is already a first-order approximation of  $g$  due to  $g = b_m + \mathcal{O}(b_m^2) \approx b_m$ , since  $e^b$

139 can be expanded into Taylor polynomial  $e^b = \sum_{n=0}^{\infty} \frac{b^n}{n!} = 1 + b + \mathcal{O}(b^2)$ . Here,  $\mathcal{O}(b^2)$  denotes a  
140 variable with absolute value at most some constant times  $|b^2|$  when  $b$  is close enough to 0. The  
141 following analyses are based on  $g$ . The geographical distribution of  $g$  is shown in Fig. 4. The  
142 growth rate exhibits obvious spatial clusters, e.g., the distinct difference between east and west  
143 Europe.

## 144 2.5 Correlations of the daily growth rate with the meteorological factors

145 Fig. 5 presents the correlation analyses between the least-constrained growth rate  $g$  and six  
146 meteorological factors, i.e., (a) the ultraviolet (UV) flux in the range 250-440nm, (b) the air  
147 temperature at 2m above the surface, (c) the diurnal temperature range, (d) the relative humidity,  
148 (e) the wind speed at the height of 10m, and (f) the precipitation. The meteorological factors  
149 are sampled and averaged in a 28-day-wide window centering at 7 days before the center of the  
150 growth rate's sampling window. The 7-day displacement is used to deal with the COVID-19  
151 incubation period, e.g., [18]. We determine the length of the incubation period in the following  
152 subsection.

153 The growth rate exhibits a significant correlation with the UV flux and the air temperature  
154 ( $r=-0.55\pm 0.09$  and  $-0.40\pm 0.10$  at  $p \ll 0.01$ , in Fig. 5a and 5b, respectively), but not with  
155 the other meteorological conditions, namely, wind speed, relative humidity, diurnal temperature  
156 range, and precipitation ( $p \geq 0.05$ , Fig. 5c–5f). According to the regressions, an increase in  
157 UV flux by  $1 \text{ W/m}^2$  is associated with a decrease in the growth rate by  $0.36\pm 0.15\%$  per day,  
158 and an increase of the temperature by  $1^\circ\text{C}$  is associated with a decrease in the growth rate by  
159  $0.19\pm 0.12\%$  per day.



## 160 **2.6 A cross-correlation analysis suggests an incubation period**

161 The previous subsection uses a time displacement  $\delta t = 7\text{day}$  between the sampling window of  
162 the growth rate and that of the meteorological factors to deal with the incubation period. To  
163 determine the incubation period, we calculate the absolute correlation coefficient of the growth  
164 rate with the UV flux  $|r_{UV}|$ , as a function of the displacement  $\delta t$ , displayed in Fig. 6.

165 In Fig. 6,  $|r_{UV}|$  maximizes at a displacement of seven days, indicating a 7-day delayed  
166 response of the growth to UV flux. A clinical study [19] suggested a mean of an incubation  
167 period of 6.4 days, while a cross-sectional and a forward follow-up analysis [16] reported a  
168 median incubation of 7.76 days. These measures of the incubation period are comparable to  
169 the 7-day delay diagnosed herein. Our results provide evidence of the incubation period from  
170 analyzing confirmed cases instead of controlled experiments from clinical studies.

171 All results presented above are based on 50% of the most developed countries. For compar-  
172 ison, we conducted the same investigations with data from all countries (not shown), and found  
173 that the incubation period signature weakened. The weakening could be attributed to the so-  
174 cioeconomic factors and potentially less timely tests in less developed countries, e.g., [15, 16].  
175 The delayed tests could reshape the cross-correlation analysis and bias the quantification of the  
176 meteorological modulation.

## 177 **3 Discussions and conclusions**

178 Above we illustrate that the least-constrained growth rate exhibits obvious spatial clusters, sig-  
179 nificant correlations with the meteorological conditions (UV flux and temperature). The UV  
180 correlation exhibits a delay of about seven days, which is explained as a signature of the incu-  
181 bation period. While spatial clusters and the correlation might be attributed to socioeconomic  
182 factors' spatial difference [15, 16], the delay cannot. The temporal variations of socioeconomic

## COVID-19 incubation period reflected by delayed solar UV modulation

---

183 factors are at scales much longer than the 7-day delay, which, therefore, can neither modu-  
184 late the COVID-19 nor respond to the UV flux at seven days. On the other way around, the  
185 presence of the incubation period signature indicates the robustness of the UV modulation on  
186 transmission.

187 There are at least three factors through which meteorological conditions can modulate the  
188 transmission. The first is human behaviors. When the temperature is low, humans typically  
189 spend more time indoors, with reduced social distancing and less ventilation than outdoors.  
190 As an example, schools are places of enhanced influenza transmission [20] for intense indoor  
191 activities. The second factor is the immune system of susceptible hosts. Solar radiation drives  
192 changes in the human immune system by modulating melatonin [21] and/or vitamin D [22, 23,  
193 24].

194 The last but might be the most important factor is the virus's survival, namely the UV's viru-  
195 cidal effect. Evidence has revealed that aerosols are a medium of transmission of COVID-19,  
196 as the virus remains active on the surfaces for several hours to days [11]. Intense solar radiation  
197 may inactivate the virus on the surface through the physical properties (i.e., shape, size) and  
198 the virus's genetic material [25, 2, 26]. Simulation results revealed that 90% of the virus could  
199 be inactive under summer daytime for 6 minutes, whereas the virus becomes inactive for 125  
200 minutes under night conditions [1]. In addition, high temperature shortens the virus survival  
201 time [27, 28, 3]. On the opposite, low temperature favors prolonging survival on infected sur-  
202 faces and aerosols, which promotes the diffusion of the infection. The modulation of relative  
203 humidity, on the other hand, is negligible, as supported by laboratory experiments[1], which  
204 is different from the sensitive modulation on the influenza virus survival [29] and transmission  
205 [30].

206 The 7-day-delayed response to the UV flux (Fig. 6) reflects the incubation period, whereas  
207 the temperature response does exhibit a delay. A potential explanation is that temperature varia-

## COVID-19 incubation period reflected by delayed solar UV modulation

---

208 tion is characterized by a temporal scale longer than the incubation period, and therefore cannot  
209 resolve the incubation period. Another potential explanation is that the temperature might not  
210 be an independent driver of the transmission but a response to solar radiation. The tempera-  
211 ture correlates significantly with the UV flux ( $r=0.86\pm 0.03$  at  $p=1.3\times 10^{-17}$ ). We carried out  
212 a canonical-correlation analysis, e.g., [31], between the growth rate and the UV flux and tem-  
213 perature, resulting in a canonical correlation coefficient  $c_{UV,T}=-0.58\pm 0.08$ . The canonical cor-  
214 relation coefficient is close to the UV correlation coefficient  $r_{UV}=-0.55\pm 0.09$  (Fig. 5a), which  
215 means that using both the UV and temperature as predictors can not explain more variance than  
216 using the UV alone.

217 The UV impact can drive a seasonality of COVID-19 transmission and explain the following  
218 geographic dependence of COVID-19. (1) The mortality exhibits a latitudinal dependence [24].  
219 (2) The late outbreak in Africa and arid central Asia is attributable to intense UV flux due to the  
220 low cloud fraction prior. (3) The onset of the Asian summer monsoon, increases clouds in early  
221 May [32] and yields low UV flux, which may account for the late outbreak in India and many  
222 southeastern Asia countries until early May. (4) The decrease in UV and temperature during  
223 the coming austral winter can contribute to the sharp increase in South America. For example,  
224 both the confirmed and dead cases in Brazil ranked second in the world since 13 June, and the  
225 transmission enhanced at high latitudes, such as North America and Europe November 2020.

226 The current study provides evidence to support the hypothesis that the UV radiation and  
227 air temperature drive the COVID-19 transmission [24]. Our results also imply a seasonality of  
228 COVID-19 and provide a meteorological measure of the incubation period. The virus transmits  
229 more readily during winter and during the global monsoon season, which impacts about 70%  
230 of the global population [33]. Accordingly, we predict a high possibility of a resurgence in the  
231 boreal winter and suggest adapting the public policy according to the seasonal variability.

## 232 Acknowledgments

233 This study was funded by the National Science Foundation of China (41888101, 41822101  
234 and 41971022), Strategic Priority Research Program of the Chinese Academy of Sciences  
235 (XDB26020000), the State Administration of Foreign Experts Affairs of China (GS20190157002),  
236 fellowship for the National Youth Talent Support Program of China (Ten Thousand People  
237 Plan). Support from the Swedish Formas (Future Research Leaders) project is also acknowl-  
238 edged. We used the COVID-19 data of cumulative confirmed cases until 1 September of 2020 at  
239 a country level from COVID-19 Data Repository by the Center for Systems Science and Engi-  
240 neering (CSSE, <https://github.com/CSSEGISandData/COVID-19>) at Johns Hopkins University.  
241 The daily meteorological variables are extracted from the ERA5 reanalysis at C3S Climate Data  
242 Store, see <https://doi.org/10.24381/cds.adbb2d47> (C3S, 2017). The gross domestic product per  
243 capita 2019 data are download from the World Bank (<https://data.worldbank.org/>).

## 244 References

- 245 [1] M. Schuit, S. Ratnesar-Shumate, J. Yolitz, G. Williams, W. Weaver, B. Green, D. Miller,  
246 M. Krause, K. Beck, S. Wood, B. Holland, J. Bohannon, D. Freeburger, I. Hooper,  
247 J. Biryukov, L. A. Altamura, V. Wahl, M. Hevey, P. Dabisch, Airborne SARS-CoV-2 Is  
248 Rapidly Inactivated by Simulated Sunlight. *J. Infect. Dis.* **222**, 564–571 (2020).
- 249 [2] S. Ratnesar-Shumate, G. Williams, B. Green, M. Krause, B. Holland, S. Wood, J. Bo-  
250 hannon, J. Boydston, D. Freeburger, I. Hooper, K. Beck, J. Yeager, L. A. Altamura,  
251 J. Biryukov, J. Yolitz, M. Schuit, V. Wahl, M. Hevey, P. Dabisch, Simulated Sunlight  
252 Rapidly Inactivates SARS-CoV-2 on Surfaces. *J. Infect. Dis.* **222**, 214–222 (2020).
- 253 [3] M. Ujiie, S. Tsuzuki, N. Ohmagari, Effect of temperature on the infectivity of COVID-19.  
254 *Int. J. Infect. Dis.* **95**, 301–303 (2020).

COVID-19 incubation period reflected by delayed solar UV modulation

---

- 255 [4] Y. Yao, J. Pan, Z. Liu, X. Meng, W. Wang, H. Kan, W. Wang, No association of COVID-  
256 19 transmission with temperature or UV radiation in Chinese cities. *Eur. Respir. J.* **55**,  
257 2000517 (2020).
- 258 [5] H. Qi, S. Xiao, R. Shi, M. P. Ward, Y. Chen, W. Tu, Q. Su, W. Wang, X. Wang, Z. Zhang,  
259 Covid-19 transmission in mainland china is associated with temperature and humidity: A  
260 time-series analysis. *Science of The Total Environment* **728**, 138778 (2020).
- 261 [6] M. M. Sajadi, P. Habibzadeh, A. Vintzileos, S. Shokouhi, F. Miralles-Wilhelm,  
262 A. Amoroso, Temperature, Humidity, and Latitude Analysis to Estimate Potential Spread  
263 and Seasonality of Coronavirus Disease 2019 (COVID-19). *JAMA Netw. open* **3**,  
264 e2011834–e2011834 (2020).
- 265 [7] M. M. Iqbal, I. Abid, S. Hussain, N. Shahzad, M. S. Waqas, M. J. Iqbal, The effects of  
266 regional climatic condition on the spread of COVID-19 at global scale. *Sci. Total Environ.*  
267 **739**, 140101 (2020).
- 268 [8] B. F. Maier, D. Brockmann, Effective containment explains subexponential growth in re-  
269 cent confirmed COVID-19 cases in China. *Science (80-. )*. **368**, 742–746 (2020).
- 270 [9] S. d. Picoli Junior, J. J. V. Teixeira, H. V. Ribeiro, L. C. Malacarne, R. P. B. d. Santos,  
271 R. d. S. Mendes, Spreading patterns of the influenza a (h1n1) pandemic. *PLOS ONE* **6**,  
272 1-4 (2011).
- 273 [10] A. G. Hunt, Exponential growth in ebola outbreak since may 14, 2014. *Complexity* **20**,  
274 8-11 (2014).
- 275 [11] Y. Liu, A. A. Gayle, A. Wilder-Smith, J. Rocklöv, The reproductive number of COVID-19  
276 is higher compared to SARS coronavirus. *J. Travel Med.* **27** (2020).

- 277 [12] R. M. Anderson, B. Anderson, R. M. May, *Infectious diseases of humans: dynamics and*  
278 *control* (Oxford university press, 1992).
- 279 [13] S. Lai, N. W. Ruktanonchai, L. Zhou, O. Prosper, W. Luo, J. R. Floyd, A. Wesolowski,  
280 M. Santillana, C. Zhang, X. Du, H. Yu, A. J. Tatem, Effect of non-pharmaceutical inter-  
281 ventions to contain COVID-19 in China. *Nature* (2020).
- 282 [14] H. Tian, Y. Liu, Y. Li, C. H. Wu, B. Chen, M. U. Kraemer, B. Li, J. Cai, B. Xu, Q. Yang,  
283 B. Wang, P. Yang, Y. Cui, Y. Song, P. Zheng, Q. Wang, O. N. Bjornstad, R. Yang, B. T.  
284 Grenfell, O. G. Pybus, C. Dye, An investigation of transmission control measures during  
285 the first 50 days of the COVID-19 epidemic in China. *Science* (80-. ). **368**, 638–642  
286 (2020).
- 287 [15] S. Khalatbari-Soltani, R. C. Cumming, C. Delpierre, M. Kelly-Irving, Importance of col-  
288 lecting data on socioeconomic determinants from the early stage of the COVID-19 out-  
289 break onwards. *J. Epidemiol. Community Health* **74**, 620–623 (2020).
- 290 [16] A. Guha, J. Bonsu, A. Dey, D. Addison, Community and Socioeconomic Factors Associ-  
291 ated with COVID-19 in the United States: Zip code level cross sectional analysis. *medRxiv*  
292 *Prepr. Serv. Heal. Sci.* p. 2020.04.19.20071944 (2020).
- 293 [17] M. Kapoor, A. Malani, S. Ravi, A. Agrawal, Authoritarian governments appear to manip-  
294 ulate covid data (2020).
- 295 [18] S. A. Lauer, K. H. Grantz, Q. Bi, F. K. Jones, Q. Zheng, H. R. Meredith, A. S. Azman,  
296 N. G. Reich, J. Lessler, The incubation period of coronavirus disease 2019 (CoVID-19)  
297 from publicly reported confirmed cases: Estimation and application. *Ann. Intern. Med.*  
298 **172**, 577–582 (2020).

COVID-19 incubation period reflected by delayed solar UV modulation

---

- 299 [19] J. Qin, C. You, Q. Lin, T. Hu, S. Yu, X.-H. Zhou, Estimation of incubation period distri-  
300 bution of covid-19 using disease onset forward time: A novel cross-sectional and forward  
301 follow-up study. *Science Advances* **6** (2020).
- 302 [20] S. Cauchemez, A. J. Valleron, P. Y. Boëlle, A. Flahault, N. M. Ferguson, Estimating the  
303 impact of school closure on influenza transmission from Sentinel data. *Nature* **452**, 750–  
304 754 (2008).
- 305 [21] S. F. Dowell, Seasonal variation in host susceptibility and cycles of certain infectious  
306 diseases. *Emerg. Infect. Dis.* **7**, 369–374 (2001).
- 307 [22] Abhimanyu, A. K. Coussens, The role of uv radiation and vitamin d in the seasonality and  
308 outcomes of infectious disease. *Photochem. Photobiol. Sci.* **16**, 314-338 (2017).
- 309 [23] A. R. Martineau, D. A. Jolliffe, R. L. Hooper, L. Greenberg, J. F. Aloia, P. Bergman,  
310 G. Dubnov-Raz, S. Esposito, D. Ganmaa, A. A. Ginde, E. C. Goodall, C. C. Grant,  
311 C. J. Griffiths, W. Janssens, I. Laaksi, S. Manaseki-Holland, D. Mauger, D. R. Murdoch,  
312 R. Neale, J. R. Rees, S. Simpson, I. Stelmach, G. T. Kumar, M. Urashima, C. A. Camargo,  
313 Vitamin d supplementation to prevent acute respiratory tract infections: systematic review  
314 and meta-analysis of individual participant data. *BMJ* **356** (2017).
- 315 [24] P. B. Whittemore, COVID-19 Fatalities, Latitude, Sunlight, and Vitamin D. *Am. J. Infect.*  
316 *Control* (2020).
- 317 [25] J. L. Sagripanti, C. D. Lytle, Inactivation of influenza virus by solar radiation. *Photochem.*  
318 *Photobiol.* **83**, 1278–1282 (2007).
- 319 [26] D. Sutton, E. W. Aldous, C. J. Warren, C. M. Fuller, D. J. Alexander, I. H. Brown, Inac-  
320 tivation of the infectivity of two highly pathogenic avian influenza viruses and a virulent  
321 Newcastle disease virus by ultraviolet radiation. *Avian Pathol.* **42**, 566–568 (2013).

COVID-19 incubation period reflected by delayed solar UV modulation

---

- 322 [27] J. M. Abduljalil, B. M. Abduljalil, Epidemiology, genome, and clinical features of the  
323 pandemic SARS-CoV-2: a recent view. *New Microbes New Infect.* **35** (2020).
- 324 [28] S. S. Gunthe, B. Swain, S. S. Patra, A. Amte, On the global trends and spread of the  
325 COVID-19 outbreak: preliminary assessment of the potential relation between location-  
326 specific temperature and UV index. *J. Public Heal.* pp. 1–10 (2020).
- 327 [29] J. Shaman, M. Kohn, Absolute humidity modulates influenza survival, transmission, and  
328 seasonality. *Proceedings of the National Academy of Sciences* **106**, 3243–3248 (2009).
- 329 [30] E. Kudo, E. Song, L. J. Yockey, T. Rakib, P. W. Wong, R. J. Homer, A. Iwasaki, Low am-  
330 biant humidity impairs barrier function and innate resistance against influenza infection.  
331 *Proc. Natl. Acad. Sci. U. S. A.* **166**, 10905–10910 (2019).
- 332 [31] G. A. F. Seber, *Multivariate observations*, vol. 252 (John Wiley & Sons, 2009).
- 333 [32] B. Wang, L. Ho, Rainy season of the Asian-Pacific summer monsoon. *J. Clim.* **15**, 386–398  
334 (2002).
- 335 [33] P. X. Wang, B. Wang, H. Cheng, J. Fasullo, Z. T. Guo, T. Kiefer, Z. Y. Liu, The global  
336 monsoon across time scales: Mechanisms and outstanding issues. *Earth-Science Rev.* **174**,  
337 84–121 (2017).



COVID-19 incubation period reflected by delayed solar UV modulation

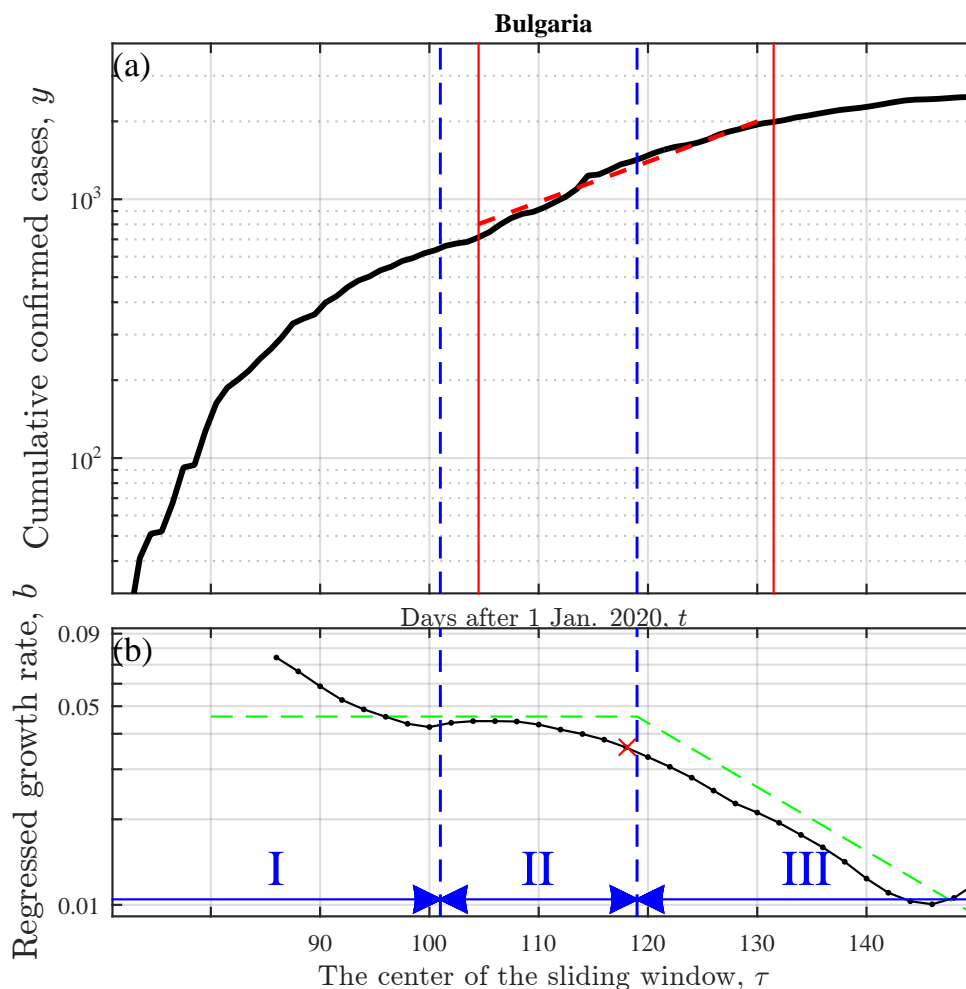

Figure 1: (a) Cumulative confirmed cases  $y$  as a function of time  $t$  and (b) its growth rate  $b$  against the regression time parameter  $\tau$ , for Bulgaria as an example. The growth rate  $b$  (black line in (b)) is regressed according to the model  $y = ae^{b(t-\tau)}$  in a 28-day-wide sliding window centering at  $\tau=86, 88, \dots, 152$ , where  $a$  represents the model initial confirmed cases (namely, the regressed  $y$  value at  $\tau$ ). The growth of confirmed cases could be divided into three stages: Stages I, II and III, sketched by blue symbols in (b). In Stage II, the growth is stable ( $0.035 < b < 0.045$ ), whereas in the other two,  $b$  decreases by more than 0.02. In Stages II and III but not in Stage I, the real growth is largely consistent with the ideal evolution that is sketched as the green line in (b) according to, e.g. [11, 12]. We attribute the discrepancy in Stage I to an insufficient test capability at the early stage. The red symbols denote the least-constrained growth rate and its sampling window (see Sections 2.1–2.3 for details).

COVID-19 incubation period reflected by delayed solar UV modulation

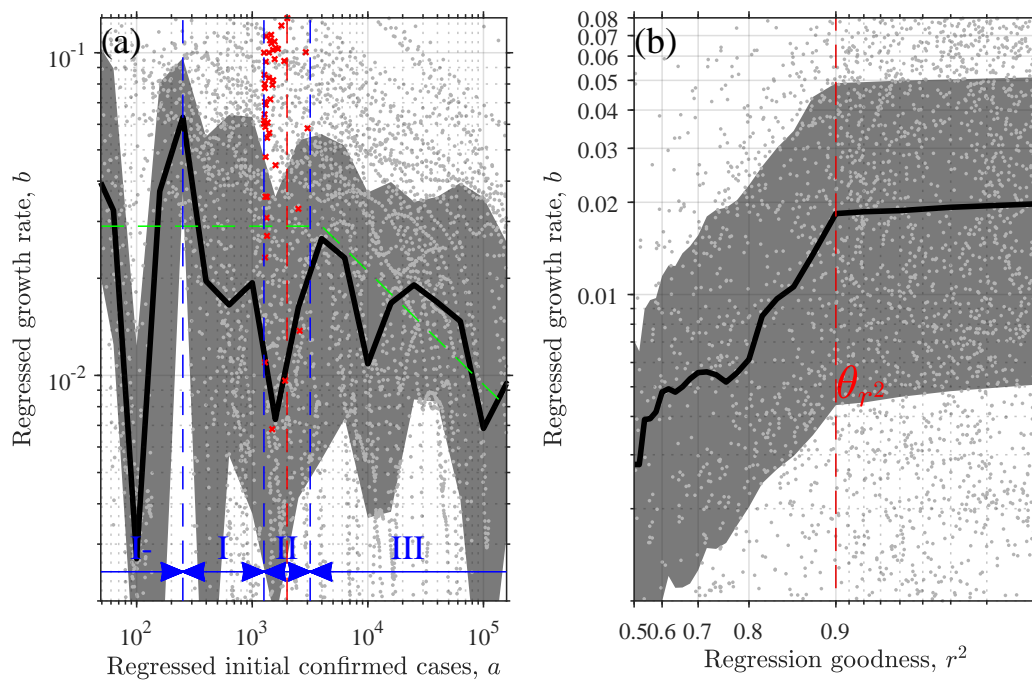

Figure 2: The growth rate  $b$  of the confirmed cases against (a) the regressed initial confirmed cases  $a$  and (b) the goodness  $r^2$  of the exponential regression as instanced in Fig. 1. In each panel, one dot corresponds to one sliding step of the regression; and the bold black solid line and gray shadow illustrate the median and the interquartile range, respectively. In (a), the green line sketches the ideal evolution according to, e.g. [12]; the blue symbols sketch different Stages of the evolution of the outbreak among which Stages I, II and III are the statistical estimations of Stages I, II and III instanced in Fig. 1. Stage II is centering at the red dashed line  $a_c = 2000$ , determined in Section 2.3. In (a), the red crosses denote the least-constrained growth rate  $b_m$ , namely, the maximum  $b$  in Stage II for each country. In (b), the red line displays the threshold value  $\theta_{r^2} = 0.9$  in (b) used in selecting  $b_m$ . See Section 2.2 for the details.

COVID-19 incubation period reflected by delayed solar UV modulation

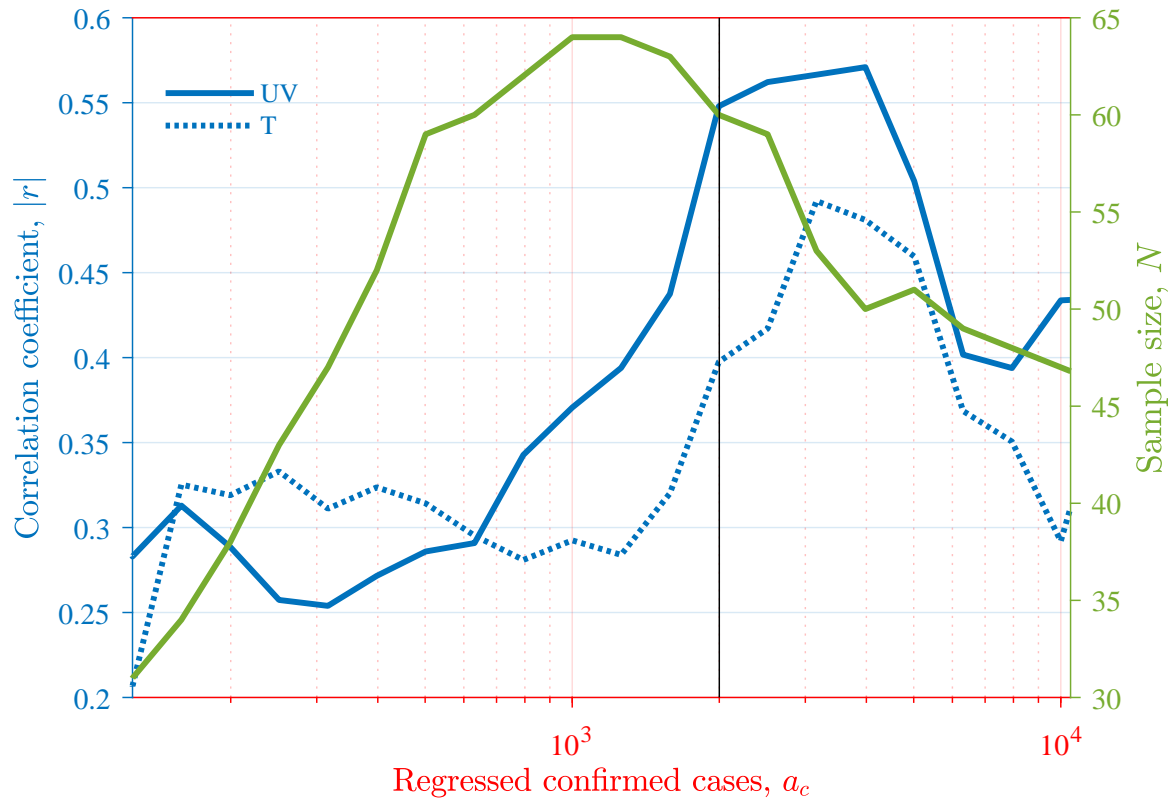

Figure 3: The absolute correlation coefficients  $|r|$  (between  $b_m$  and two meteorological factors) and valid sampling size  $N$  as functions of  $a_c$ . The black line represents the  $a_c$  used for calculating the  $b_m$  in the current work. See Section 2.3 for the details.

COVID-19 incubation period reflected by delayed solar UV modulation

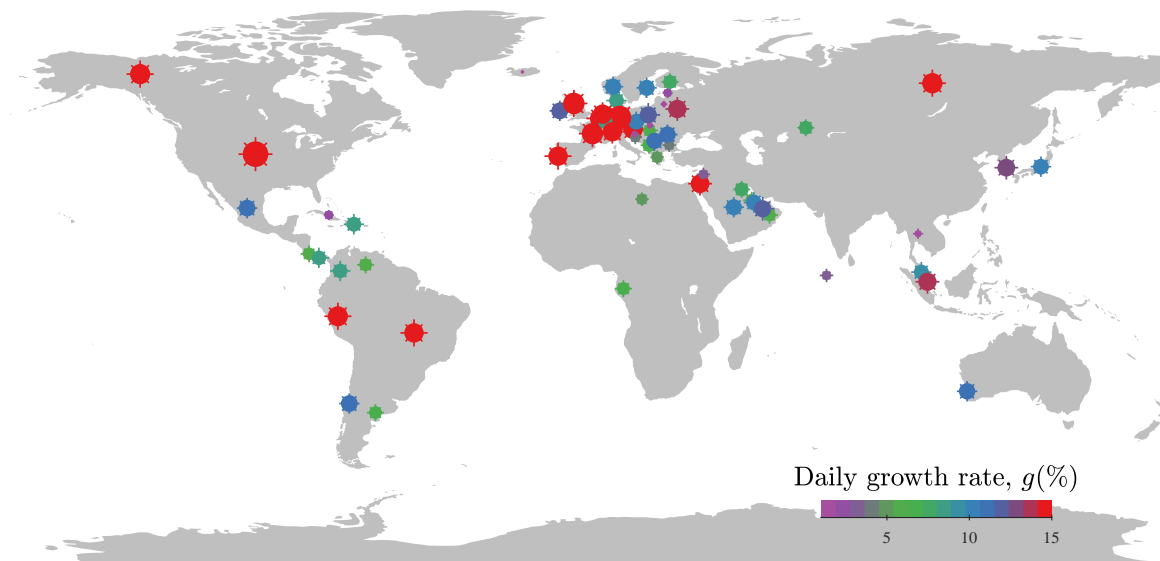

Figure 4: Global distribution of the daily growth rate  $g$  of COVID-19 confirmed cases. Each point represents one country/region. Both the color and the size of the symbols represent the growth rate. The growth rate is estimated through a sliding window regression detailed in Section 2.1 and an optimization in Section 2.3. Here, only 50% of most developed countries are included (according to the gross domestic product per capita 2019).

COVID-19 incubation period reflected by delayed solar UV modulation

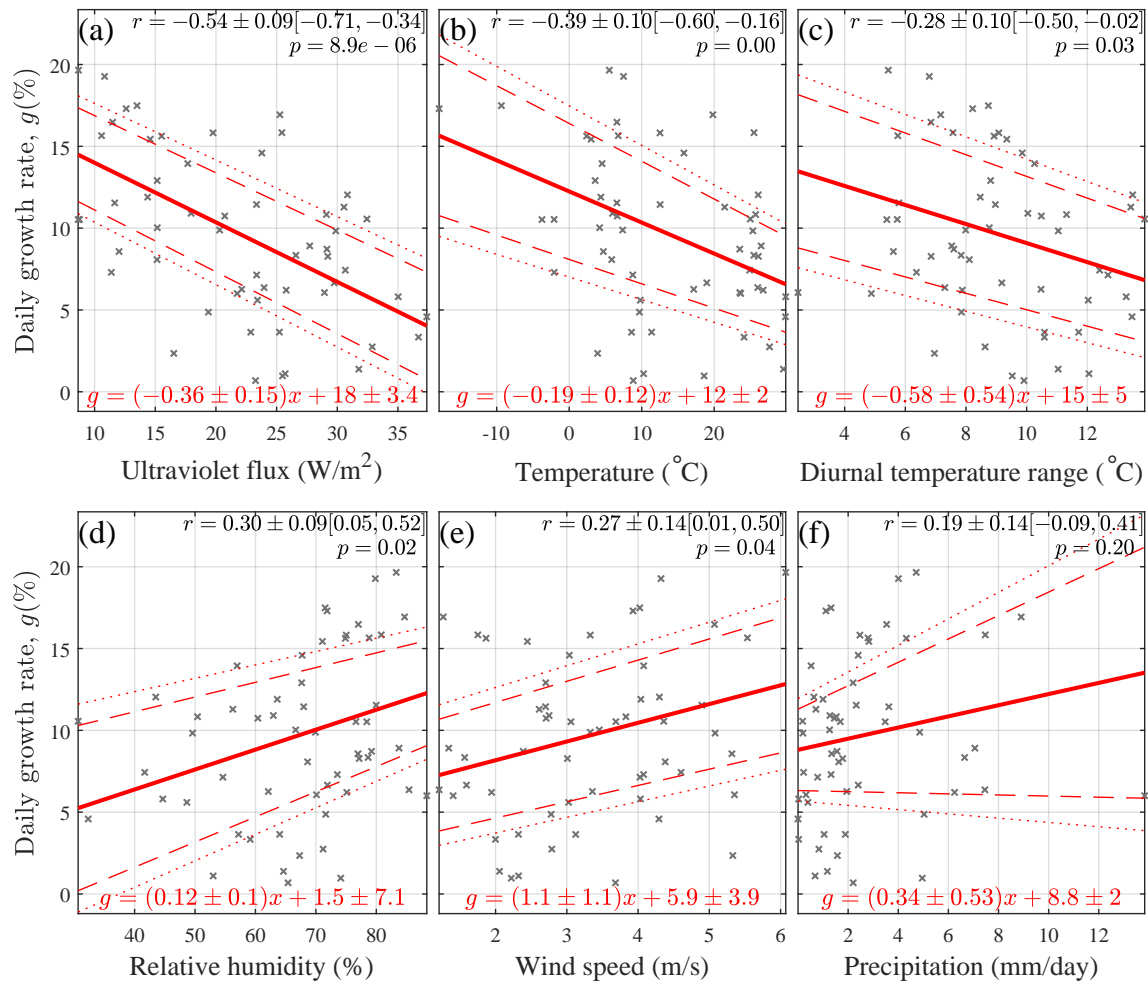

Figure 5: Correlation between the daily growth rate  $g$  and six meteorological variables: (a) the ultraviolet (UV) flux in the range 250-440nm, (b) the air temperature at 2m above the surface, (c) the diurnal temperature range, (d) the relative humidity, (e) the wind speed at the height of 10m, and (f) the precipitation. In each panel, one cross represents one country, corresponding to one red cross displayed in Fig. 2a; the solid red line presents a robust regression to a linear model  $g = \beta_1 * x + \beta_0$  through the least absolute deviations method, and the dashed and dotted lines display the significance level  $\alpha = 0.05$  and  $0.01$ , respectively. Here,  $x$  denotes one of the above six variables, and  $\beta_1$  and  $\beta_0$  denote the parameters to be determined. The regression results are displayed in red on the bottom of each panel, while the Pearson correlation coefficient  $r$  is printed on the upright corner, in the format of  $r \pm \Delta r[r_l, r_u]$ . Here,  $r$  and  $\Delta r$  are the mean coefficient and its standard deviation estimated through a bootstrapping method, and  $r_l$  and  $r_u$  are the lower and upper bounds for a 95% confidence interval. Also displayed on the top is the  $p$ -value for testing the hypothesis of no correlation.

COVID-19 incubation period reflected by delayed solar UV modulation

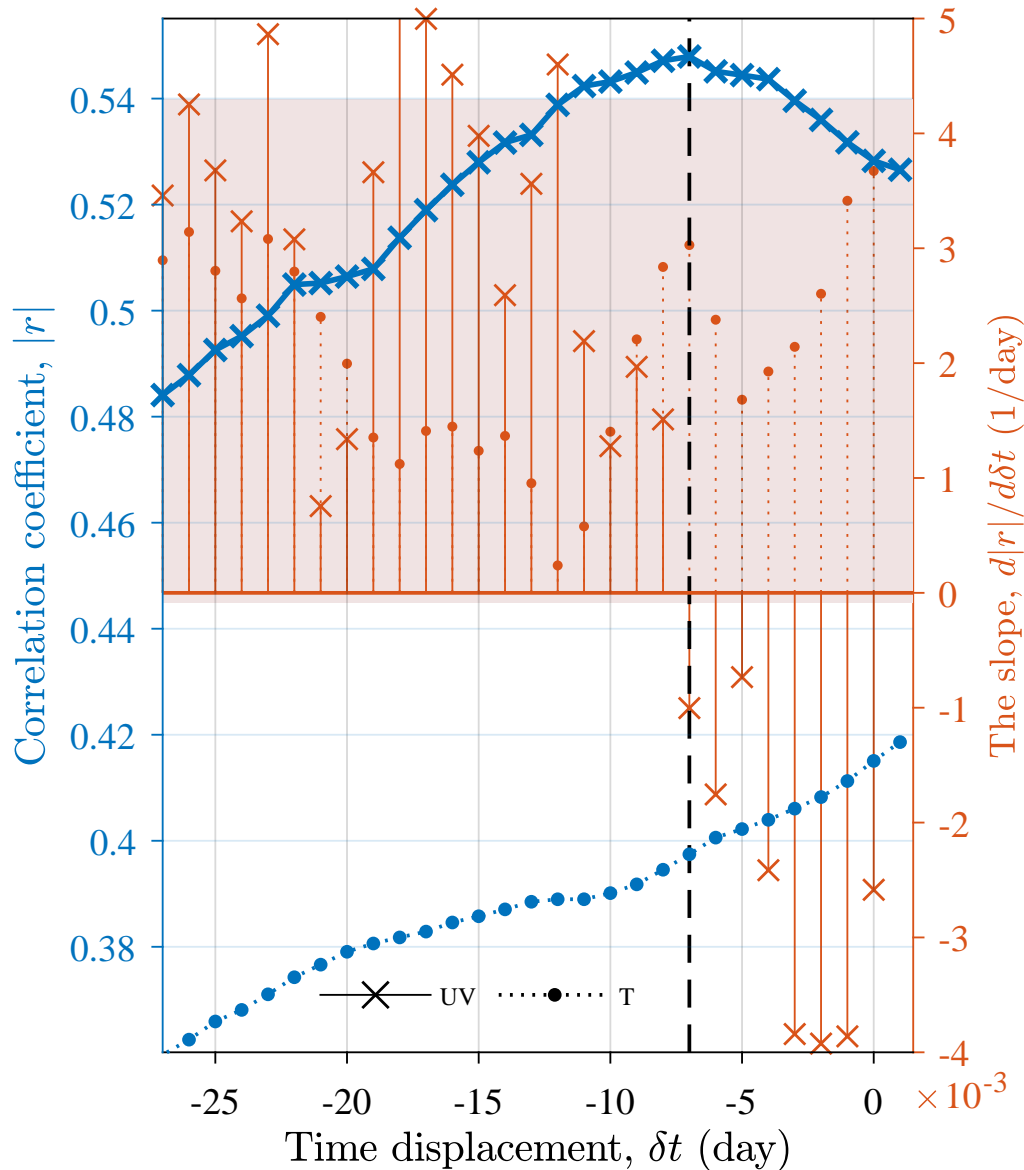

Figure 6: The absolute correlation coefficients  $|r|$  between the growth rate  $g$  and two meteorological factors, the UV flux and temperature  $T$ , as functions of the time displacement  $\delta t$ , and their slopes calculated using the centered differencing method. The shadow illustrates one standard deviation of the slopes below and above their average. See Section 2.6 for the details.
